# Supplementary material
Source: Springer Nature journal article supplement (https://www.springermedizin.de/resource/supplementary/12958_2013_1180_MOESM5_ESM.pdf/9567086)

### Determination of the optimal number of control genes for normalization

**A**

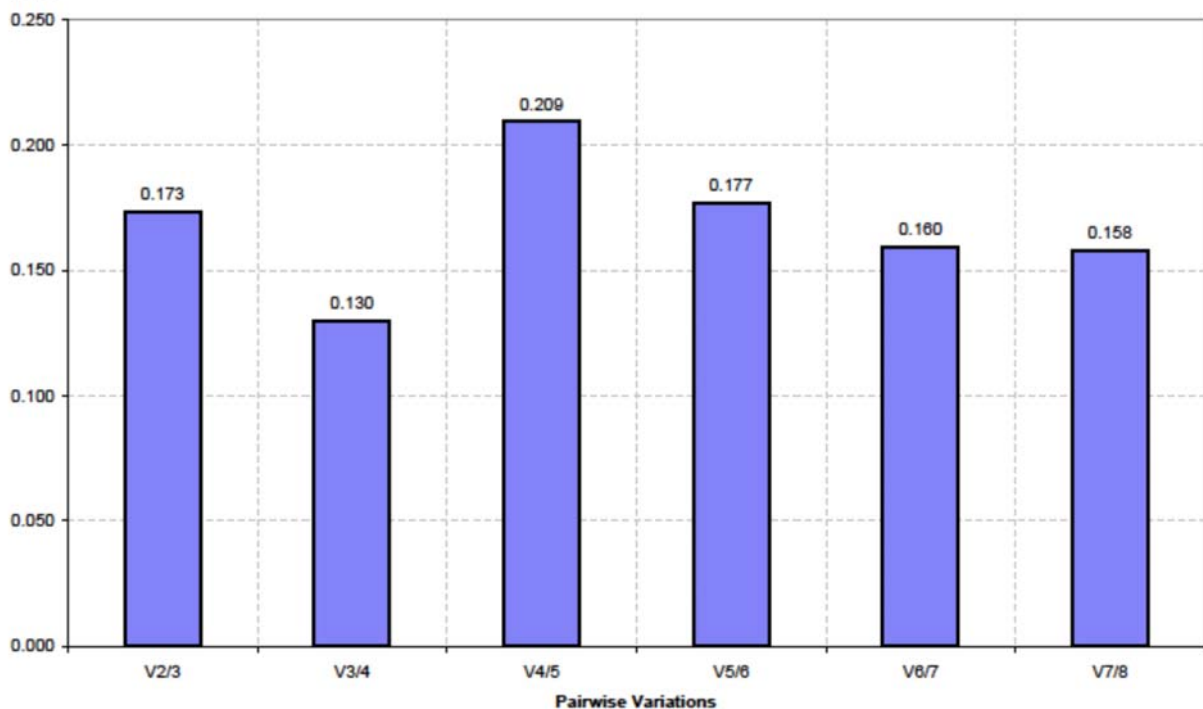

**B**

### Average expression stability values of remaining control genes

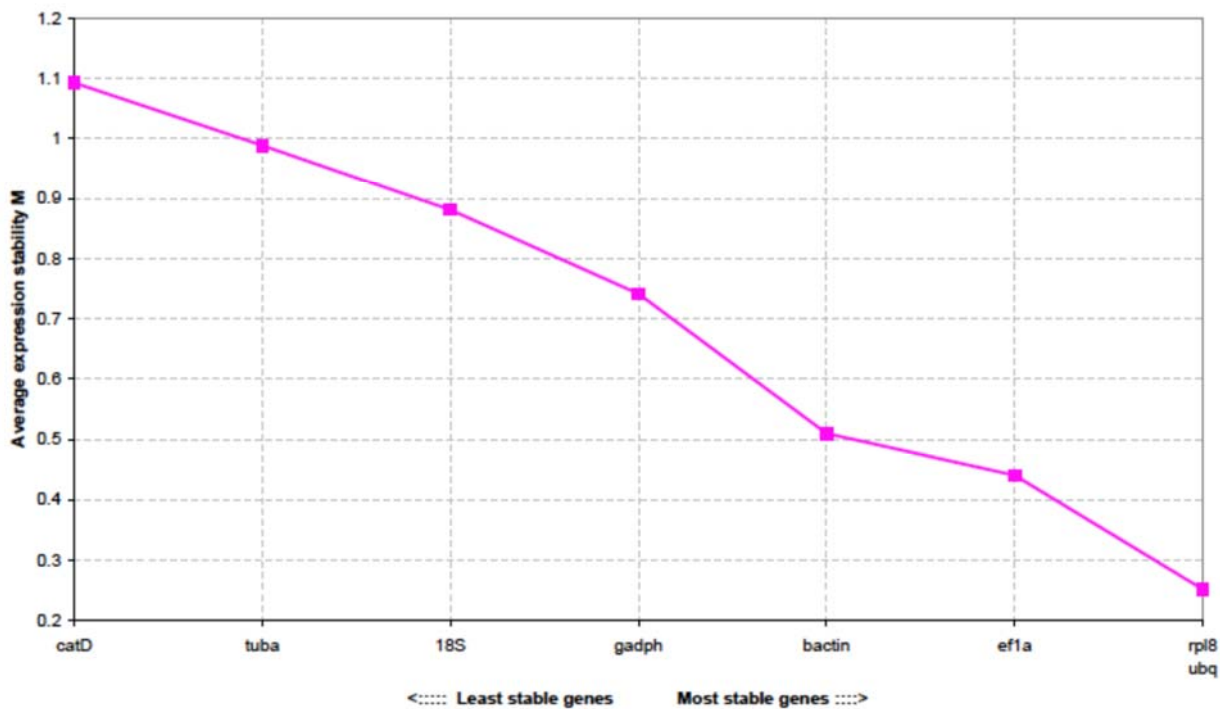

Supplement: MOESM5 [file 9567086]
